# Supplementary material for: Bioactive Natural Products for Chemical Control of Microorganisms: Scientific Prospecting (2001–2021) and Systematic Review
Source: MDPI journal article supplement (doi:10.3390/molecules27185917), 2022-09-12
Supplement: s1 [file s1]

## Supplementary Materials

# Bioactive Natural Products for Chemical Control of Microorganisms: Scientific Prospecting (2001–2021) and Systematic Review

Bruno Fonsêca Feitosa <sup>1,\*</sup>, Charlene Maria de Alcântara <sup>2</sup>, Amanda Beatriz Sales de Lima <sup>3</sup>, Adriano Sant’Ana Silva <sup>2</sup>, Alfredina dos Santos Araújo <sup>2</sup>, Mônica Tejo Cavalcanti <sup>4</sup>, Edna Mori <sup>5</sup>, Isaac Moura Araújo <sup>6</sup>, Pablo Antonio Maia de Farias <sup>6</sup>, Polrat Wilairatana <sup>7,\*</sup> and Henrique Douglas Melo Coutinho <sup>6,\*</sup>

<sup>1</sup> Faculty of Food Engineering, State University of Campinas, Monteiro Lobato, 80, University City “Zeferino Vaz”, Campinas 13083-862, SP, Brazil

<sup>2</sup> Academic Unit of Food Technology, Federal University of Campina Grande, Jairo Vieira Feitosa, 1770, Pereiros, Pombal 58840-000, PB, Brazil

<sup>3</sup> Department of Rural and Animal Technology, State University of Southwest Bahia, Praça Primavera, 40, Primavera, Itapetinga 45700-000, BA, Brazil

<sup>4</sup> National Institute of the Semiarid Region, Francisco Lopes de Almeida, Serrotão, Campina Grande 58434-700, PB, Brazil

<sup>5</sup> CECAPE College. Av. Padre Cícero, 3917, Juazeiro do Norte 63024-015, CE, Brazil

<sup>6</sup> Department of Biological Chemistry, Regional University of Cariri, Av. Cel. Antonio Luiz, 1161, Crato 63105-000, CE, Brazil

<sup>7</sup> Department of Clinical Tropical Medicine, Faculty of Tropical Medicine, Mahidol University, Bangkok 10400, Thailand

\* Correspondence: brunofonsecafeitosa@live.com (B.F.F.); polrat.wil@mahidol.ac.th (P.W.); hdmcoutinho@gmail.com (H.D.M.C.)

Table S1. Results of the keyword searches for articles in Portuguese (PT) and English (EN).

| Keywords                      |     |                  | Database |         |        |       |
|-------------------------------|-----|------------------|----------|---------|--------|-------|
|                               |     |                  | CAPES    |         | SciELO |       |
| Term 1                        | BO  | Term 2           | PT       | EN      | PT     | EN    |
| bioactiv*                     | AND | antib*           | 285      | 137,442 | 46     | 177   |
|                               |     | antimicr*        | 298      | 65,407  | 56     | 203   |
|                               |     | bactericidal     | 19       | 11,440  | 9      | 21    |
|                               |     | biocidal         | 4        | 1,122   | 1      | 2     |
|                               |     | “chemical agent” | 1        | 427     | -      | 18    |
| phenol*                       | AND | antib*           | 3,168    | 139,073 | 130    | 224   |
|                               |     | antimicr*        | 2,033    | 62,916  | 130    | 228   |
|                               |     | bactericidal     | 79       | 11,001  | 23     | 37    |
|                               |     | biocidal         | 11       | 1,770   | -      | 4     |
|                               |     | “chemical agent” | 10       | 689     | 2      | -     |
| phytochemical                 | AND | antib*           | 162      | 21,425  | 33     | 95    |
|                               |     | antimicr*        | 172      | 17,984  | 39     | 117   |
|                               |     | bactericidal     | 9        | 2,802   | 2      | 15    |
|                               |     | biocidal         | 4        | 155     | -      | -     |
|                               |     | “chemical agent” | -        | 88      | -      | 2     |
| “essential oil” OR<br>extract | AND | antib*           | 888      | 266,936 | 322    | 742   |
|                               |     | antimicr*        | 1,000    | 104,795 | 390    | 822   |
|                               |     | bactericidal     | 83       | 18,233  | 65     | 134   |
|                               |     | biocidal         | 15       | 2,296   | 6      | 6     |
|                               |     | “chemical agent” | 5        | 908     | 2      | 4     |
| Total                         |     |                  | 8,246    | 866,909 | 1,256  | 2,853 |

BO, Boolean operator; -, no article retrieved.

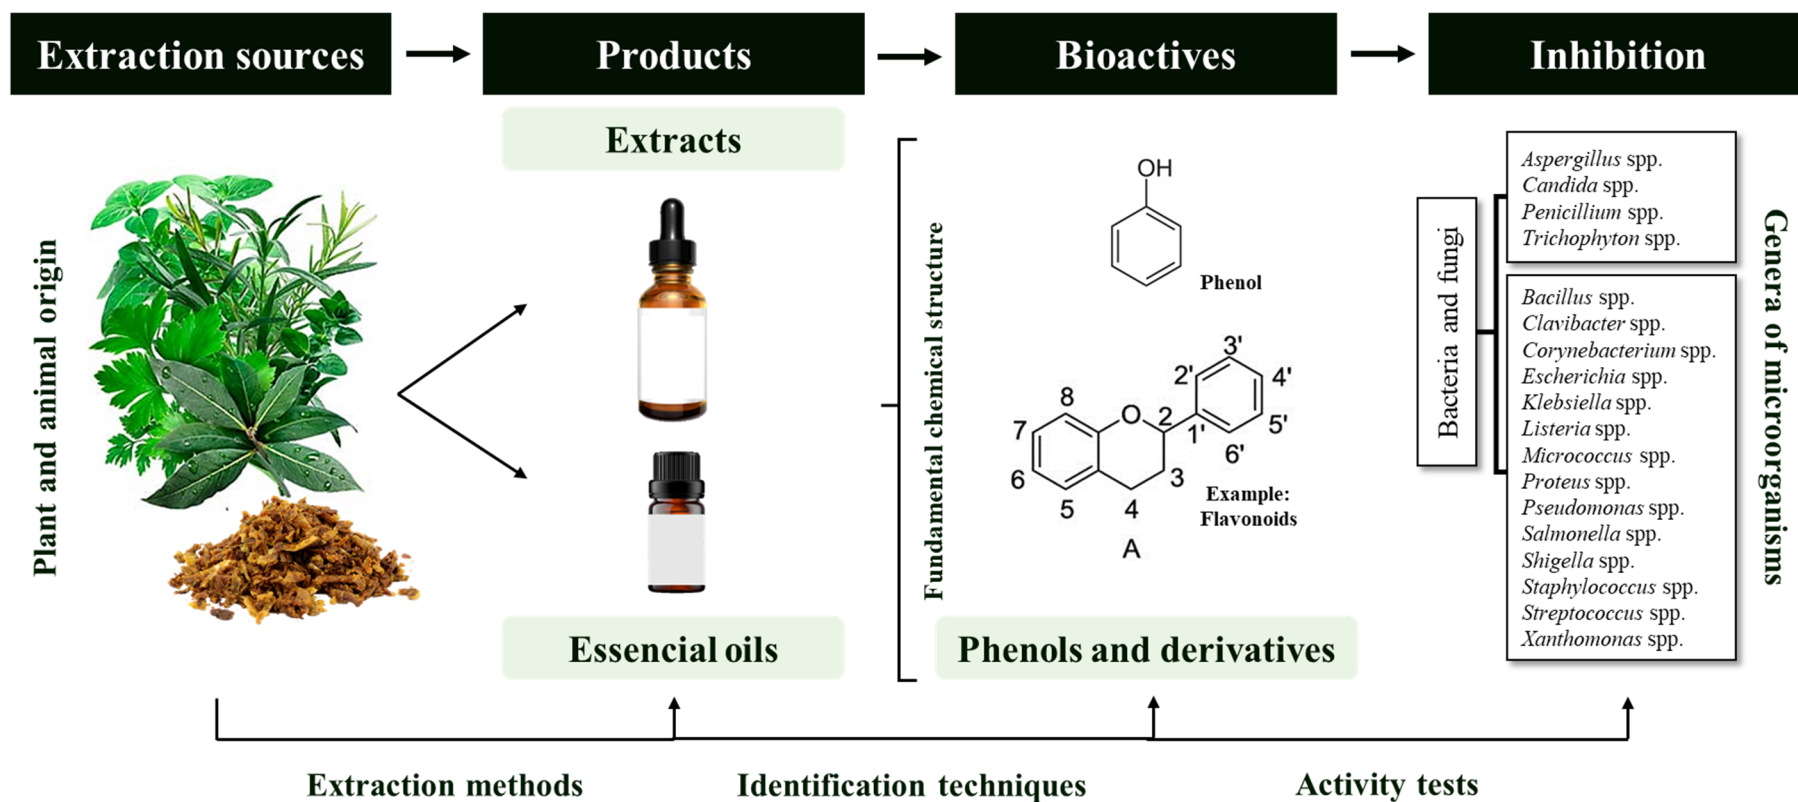

Figure S1. Graphical abstract of scientific information on bioactive natural products for microbial control.

Table S2. List of keywords used to search for scientific articles on bioactive natural products for microbial control in Portuguese and English.

| Database | Searches (27–30 April 2021)                                                                                                                                                                                                                                                                                                                                                                                                                                                                                                                                                                                                       |                                                                                                                                                                                                                                                                                                                                                                                                                                                                                                                                                                                                                                                          |
|----------|-----------------------------------------------------------------------------------------------------------------------------------------------------------------------------------------------------------------------------------------------------------------------------------------------------------------------------------------------------------------------------------------------------------------------------------------------------------------------------------------------------------------------------------------------------------------------------------------------------------------------------------|----------------------------------------------------------------------------------------------------------------------------------------------------------------------------------------------------------------------------------------------------------------------------------------------------------------------------------------------------------------------------------------------------------------------------------------------------------------------------------------------------------------------------------------------------------------------------------------------------------------------------------------------------------|
|          | Portuguese                                                                                                                                                                                                                                                                                                                                                                                                                                                                                                                                                                                                                        | English                                                                                                                                                                                                                                                                                                                                                                                                                                                                                                                                                                                                                                                  |
| CAPEs    | bioativ* AND antib*; bioativ* AND antimicr*; bioativ* AND bactericida; bioativ* AND biocida; bioativ* AND “agente químico”; fenol* AND antib*; fenol* AND antimicr*; fenol* AND bactericida; fenol* AND biocida; fenol* AND “agente químico”; fitoquímico AND antib*; fitoquímico AND antimicr*; fitoquímico AND bactericida; fitoquímico AND biocida; fitoquímico AND “agente químico”; (“óleo essencial” OR extrato) AND antib*; (“óleo essencial” OR extrato) AND antimicr*; (“óleo essencial” OR extrato) AND bactericida; (“óleo essencial” OR extrato) AND biocida; (“óleo essencial” OR extrato) AND “agente químico”      | bioactiv* AND antib*; bioactiv* AND antimicr*; bioactiv* AND bactericidal; bioactiv* AND biocidal; bioactiv* AND “chemical agent”; phenol* AND antib*; phenol* AND antimicr*; phenol* AND bactericidal; phenol* AND biocidal; phenol* AND “chemical agent”; phytochemical AND antib*; phytochemical AND antimicr*; phytochemical AND bactericidal; phytochemical AND biocidal; phytochemical AND “chemical agent”; (“essential oil” OR extract) AND antib*; (“essential oil” OR extract) AND antimicr*; (“essential oil” OR extract) AND bactericidal; (“essential oil” OR extract) AND biocidal; (“essential oil” OR extract) AND “chemical agent”      |
| Database | Searches (1–4 May 2021)                                                                                                                                                                                                                                                                                                                                                                                                                                                                                                                                                                                                           |                                                                                                                                                                                                                                                                                                                                                                                                                                                                                                                                                                                                                                                          |
|          | Portuguese                                                                                                                                                                                                                                                                                                                                                                                                                                                                                                                                                                                                                        | English                                                                                                                                                                                                                                                                                                                                                                                                                                                                                                                                                                                                                                                  |
| SciELO   | bioativ* AND antib*; bioativ* AND antimicr*; bioativ* AND bactericida; bioativ* AND biocida; bioativ* AND “agente químico”; *fenol* AND antib*; *fenol* AND antimicr*; *fenol* AND bactericida; *fenol* AND biocida; *fenol* AND “agente químico”; fitoquímico AND antib*; fitoquímico AND antimicr*; fitoquímico AND bactericida; fitoquímico AND biocida; fitoquímico AND “agente químico”; (“óleo essencial” OR extrato) AND antib*; (“óleo essencial” OR extrato) AND antimicr*; (“óleo essencial” OR extrato) AND bactericida; (“óleo essencial” OR extrato) AND biocida; (“óleo essencial” OR extrato) AND “agente químico” | bioactiv* AND antib*; bioactiv* AND antimicr*; bioactiv* AND bactericidal; bioactiv* AND biocidal; bioactiv* AND “chemical agent”; *phenol* AND antib*; *phenol* AND antimicr*; *phenol* AND bactericidal; *phenol* AND biocidal; *phenol* AND “chemical agent”; phytochemical AND antib*; phytochemical AND antimicr*; phytochemical AND bactericidal; phytochemical AND biocidal; phytochemical AND “chemical agent”; (“essential oil” OR extract) AND antib*; (“essential oil” OR extract) AND antimicr*; (“essential oil” OR extract) AND bactericidal; (“essential oil” OR extract) AND biocidal; (“essential oil” OR extract) AND “chemical agent” |
